# Supplementary material for: Modes of Antiviral Action of Chemical Portions and Constituents from Woad Root Extract against Influenza Virus A FM1
Source: Hindawi journal article supplement (doi:10.1155/2016/2537294), 2016-01-01
Supplement: f1 [file 2537294.f1.pdf]

## Supplemental Tables

**Table S1 The Formation of CPE in MDCK cells pre-infected with influenza A H1N1 virus**

| Groups                                           | Initial concentration | IC50               | Dilutions |      |      |      |
|--------------------------------------------------|-----------------------|--------------------|-----------|------|------|------|
|                                                  |                       |                    | 1:2       | 1:4  | 1:8  | 1:16 |
| CB                                               | 50 µg/ml              | <u>1.5 µg/ml</u>   | –         | –    | –    | –    |
| Epigoitrin                                       | 50 µg/ml              | <u>1.3 µg/ml</u>   | –         | –    | –    | –    |
| Phenylpropanoids portion                         | 1 mg/ml               | <u>0.02 mg/ml</u>  | –         | –    | –    | –    |
| Phenylpropanoids+alkaloids+organic acid portions | 1 mg/ml               | <u>0.015 mg/ml</u> | –         | –    | –    | –    |
| Ribavirin                                        | 100 µg/ml             | <u>2.5 µg/ml</u>   | –         | –    | –    | –    |
| Cell control                                     |                       |                    | –         | –    | –    | –    |
| Virus Control                                    |                       |                    | +++±      | +++± | +++± | +++± |

The CPE (Cytopathic effect) was graded as follows: “–”= 0% CPE; “+”=0%-25% CPE; “++”=26%-50% CPE; “+++”=51%-75% CPE; “++++”=76%-100%. Cell control: Normal cells without virus infection and drug treatments. Virus control: Cells infected with influenza A FM1 virus.

**Table S2 The Formation of CPE in MDCK cells pre-treated with pure compounds and chemical portions of woad root extract**

| Groups                                           | Initial concentration | IC50              | Dilutions |     |     |      |
|--------------------------------------------------|-----------------------|-------------------|-----------|-----|-----|------|
|                                                  |                       |                   | 1:2       | 1:4 | 1:8 | 1:16 |
| CB                                               | 50 µg/ml              | <u>14 µg/ml</u>   | –         | –   | –   | –    |
| Epigoitrin                                       | 50 µg/ml              | <u>14.5 µg/ml</u> | –         | –   | –   | –    |
| Phenylpropanoids portion                         | 1mg/ml                | <u>0.2 mg/ml</u>  | –         | –   | –   | –    |
| Phenylpropanoids+alkaloids+organic acid portions | 1mg/ml                | <u>0.25 mg/ml</u> | –         | –   | –   | –    |
| Ribavirin                                        | 100 µg/ml             | <u>36.5 µg/ml</u> | –         | –   | –   | –    |
| Cell control                                     |                       |                   | –         | –   | –   | –    |
| Virus Control                                    |                       |                   | +++       | +++ | +++ | +++  |

The CPE was graded as follows: “–”= 0% CPE; “+”=0%-25% CPE; “++”=26%-50% CPE; “+++”=51%-75% CPE; “++++”=76%-100%. Cell control: Normal cells without virus infection and drug treatments. Virus control: Cells infected with influenza A FM1 virus.

**Table S3 The Formation of CPE in MDCK cells induced by virus attachment**

| Groups                                           | Initial concentration | IC50              | Dilutions |     |     |      |
|--------------------------------------------------|-----------------------|-------------------|-----------|-----|-----|------|
|                                                  |                       |                   | 1:2       | 1:4 | 1:8 | 1:16 |
| CB                                               | 50 µg/ml              | <u>28.3 µg/ml</u> | –         | –   | –   | –    |
| Epigoitrin                                       | 50 µg/ml              | <u>25.1 µg/ml</u> | –         | –   | –   | –    |
| Phenylpropanoids portion                         | 1mg/ml                | <u>0.45 mg/ml</u> | –         | –   | –   | –    |
| Phenylpropanoids+alkaloids+organic acid portions | 1mg/ml                | <u>0.55 mg/ml</u> | –         | –   | –   | –    |
| Ribavirin                                        | 100 µg/ml             | <u>47.8 µg/ml</u> | –         | –   | –   | –    |
| Cell control                                     |                       |                   | –         | –   | –   | –    |
| Virus Control                                    |                       |                   | +++       | +++ | +++ | +++  |

The CPE was graded as follows: “–”= 0% CPE; “+”=0%-25% CPE; “++”=26%-50% CPE; “+++”=51%-75% CPE; “++++”=76%-100%. Cell control: Normal cells without virus infection and drug treatments. Virus control: Cells infected with influenza A FM1 virus.
